# Supplementary material for: Universal structural parameter to quantitatively predict metallic glass properties
Source: PubMed Central journal article supplement (PMC5159863; doi:10.1038/ncomms13733), 2016-12-12
Supplement: ncomms13733-s3.pdf [file ncomms13733-s3.pdf]

1 **PEER REVIEW FILE**

2

3 **Editorial Note:** this manuscript has been previously reviewed at another journal that is not  
4 operating a transparent peer review scheme. This document only contains reviewer comments  
5 and rebuttal letters for versions considered at Nature Communications.

6
